# Supplementary material for: Optimizing The Diagnosis and Management of Dementia Within Primary Care: A Systematic Review of Systematic Reviews
Source: Research Square preprint supplement (doi:10.21203/rs.3.rs-144258/v1), 2021-01-19
Supplement: Supplementary file 1 [file 34cd3e94cda354c45160a42c.pdf]

Table 1. Screening tools and their comparators, cognitive outcomes, administration time, sensitivity and specific and conclusions from the literature included in this systematic review.

| Reference, Country                      | Number of studies included in systematic review | Intervention(s)                                                                                                                                                                                                                                                                                                      | Comparator                                              | Cognitive outcome(s) measured | Time of administration (minutes)                                                                                                                                                                                                                                                                                                           | Sensitivity (%)                                                                                       | Specificity                                                                                            | Conclusions                                                                                                                                                                                                                         | Abbreviations                                                                                                                                                                                                                                                                                                                                                                                                                                                                                                                                                                          |
|-----------------------------------------|-------------------------------------------------|----------------------------------------------------------------------------------------------------------------------------------------------------------------------------------------------------------------------------------------------------------------------------------------------------------------------|---------------------------------------------------------|-------------------------------|--------------------------------------------------------------------------------------------------------------------------------------------------------------------------------------------------------------------------------------------------------------------------------------------------------------------------------------------|-------------------------------------------------------------------------------------------------------|--------------------------------------------------------------------------------------------------------|-------------------------------------------------------------------------------------------------------------------------------------------------------------------------------------------------------------------------------------|----------------------------------------------------------------------------------------------------------------------------------------------------------------------------------------------------------------------------------------------------------------------------------------------------------------------------------------------------------------------------------------------------------------------------------------------------------------------------------------------------------------------------------------------------------------------------------------|
| Mitchell <i>et.al.</i> , United Kingdom | 44                                              | Multidomain screening tests (known as a battery detection method) in primary care which assess for multiple cognitive domains.<br>Primary care casefinding † :<br>• AMTS/MSQ,<br>• MSQ<br>• WIND-SET<br>• PCL<br>• AMTS<br>• PCL<br>Primary care screening ‡ :<br>• PCL<br>• AMTS/MSQ<br>• MSQ<br>• SPMSQ<br>• GPCOG | MMSE                                                    | Dementia                      | <b>Primary care case-finding:</b><br>• AMTS/MSQ = 4<br>• MSQ = 2<br>• WIND-SET = 1<br>• PCL = 11<br>• AMTS = 2<br>• PCL = 11<br><b>Primary care screening:</b><br>• PCL = 11<br>• AMTS/MSQ = 4<br>• MSQ = 2<br>• SPMSQ = 2<br>• GPCOG = 5<br><b>Comparator:</b><br>• MMSE = 9 with healthy individuals and 15 with patients with dementia. | <b>Battery detection methods:</b> • 84.0 (95% CI 74.2–91.8)                                           | <b>Battery detection methods:</b> • 89.9 (95% CI 78.3–97.4)                                            | The optimal individual tools were the AMTS/MSQ and PCL. AMTS was superior to the MMSE for case finding however the MMSE was optimal for screening.                                                                                  | AMTS/MSQ-Abbreviated Mental Test Score/Mental Status Questionnaire, (WIND-SET)-Specific Set of items from MMSE, PCL-Prueba cognitive de leganes, AMTS-Abbreviated mental test score, GPCOG-General practitioner's assessment of cognition, MMSEMini-Mental State Examination<br>† Case-finding is defined as any tool or questionnaire which identifies a condition with minimal false negatives, measured as the positive predicative value.<br>‡ Screening is the ability of a test to rule out a diagnosis with minimal false positives, reported as the negative predictive value. |
| Creavin <i>et al.</i> , United Kingdom  | 70                                              | • MMSE                                                                                                                                                                                                                                                                                                               | A commonly accepted clinical (gold) reference standard. | Dementia                      | • MMSE=7 with a patient with dementia and 5 with a person with normal cognition                                                                                                                                                                                                                                                            | CarneroPardo 2013:<br>• Cut point of 17 = 70 (95% CI 59-80)<br>• Cut point of 24 = 100 (95% CI 95100) | Carnero-Pardo 2013:<br>• Cut point of 17 = 93 (95% CI 89, 96)<br>• Cut point of 24 = 46 (95% CI 40-52) | Carnero-Pardo 2013 reported there were some false negatives as the sensitivity fell from 1.00 (95% CI 0.95 to 1.00) to 0.70 (95% CI 0.59 to 0.80). The summary diagnostic accuracy could not be estimated due to insufficient data. |                                                                                                                                                                                                                                                                                                                                                                                                                                                                                                                                                                                        |

|                                    |    |                                                                                                                                                                                                                                                                                                                                                                                                                                                                                                                                                                                 |                                                                             |                                        |                                                                                                                                                                                                                                                                                                                                                                                                                                                                                                                                                                                                                                                                                                                                                                                               |                                                                                                                                                                                                                                                |                                                                                                                                                                                                                                             |                                                                                                                                                                                                                                                                                                                                                                                                                                                            |                                                                                                                                                                                                                                                                                                                                                                                                                                                                                                                                                                                                                                                                                                                                                                                                                                                                                                                                                                                 |
|------------------------------------|----|---------------------------------------------------------------------------------------------------------------------------------------------------------------------------------------------------------------------------------------------------------------------------------------------------------------------------------------------------------------------------------------------------------------------------------------------------------------------------------------------------------------------------------------------------------------------------------|-----------------------------------------------------------------------------|----------------------------------------|-----------------------------------------------------------------------------------------------------------------------------------------------------------------------------------------------------------------------------------------------------------------------------------------------------------------------------------------------------------------------------------------------------------------------------------------------------------------------------------------------------------------------------------------------------------------------------------------------------------------------------------------------------------------------------------------------------------------------------------------------------------------------------------------------|------------------------------------------------------------------------------------------------------------------------------------------------------------------------------------------------------------------------------------------------|---------------------------------------------------------------------------------------------------------------------------------------------------------------------------------------------------------------------------------------------|------------------------------------------------------------------------------------------------------------------------------------------------------------------------------------------------------------------------------------------------------------------------------------------------------------------------------------------------------------------------------------------------------------------------------------------------------------|---------------------------------------------------------------------------------------------------------------------------------------------------------------------------------------------------------------------------------------------------------------------------------------------------------------------------------------------------------------------------------------------------------------------------------------------------------------------------------------------------------------------------------------------------------------------------------------------------------------------------------------------------------------------------------------------------------------------------------------------------------------------------------------------------------------------------------------------------------------------------------------------------------------------------------------------------------------------------------|
| Abd Razak <i>et al.</i> , Malaysia | 30 | <ul style="list-style-type: none"> <li>• MoCA-B;</li> <li>MoCA</li> <li>• SPMSQ</li> <li>• MEFO</li> <li>• ACE-III</li> <li>• AQT-CF</li> <li>• SLUMS</li> <li>• 5 Object Test</li> <li>• BNB Semantic Fluency</li> <li>• SMCC compared to MMSE and CDT</li> <li>• CASI-S</li> <li>• RCS</li> <li>• CPS</li> <li>• Literacy Independent Cognitive Assessment</li> <li>• BIMS; BCAT</li> <li>• 3MS</li> <li>• Mini-Cog; MIS; MF-2</li> <li>• VT-VSM; VR-DOT</li> <li>• CCS</li> <li>• CAMCI</li> <li>• CADi; CADi-2</li> <li>• DRA</li> <li>• p-AD8</li> <li>• IQCODE</li> </ul> | Comparing the feasibility and validity between the various screening tools. | Mild cognitive impairment and dementia | <ul style="list-style-type: none"> <li>• MoCA-B = 1521;</li> <li>MoCA = 10-15</li> <li>• SPMSQ = 10-15</li> <li>• MEFO = 10-15</li> <li>• ACE-III = 15</li> <li>• AQT-CF = 3-5</li> <li>• SLUMS = 7</li> <li>• 5 Object Test = &lt;5</li> <li>• BNB Semantic Fluency = 31</li> <li>• MCC compared to MMSE and CDT = NR</li> <li>• CASI-S = NR</li> <li>• RCS = &lt;3</li> <li>• CPS = NR</li> <li>• Literacy Independent Cognitive Assessment = 20</li> <li>• BIMS = 3;</li> <li>BCAT = 10-15</li> <li>• 3MS = 17</li> <li>• Mini-Cog = 3;</li> <li>MIS = 4; MF-2 = &lt;2</li> <li>• VT-VSM = &gt;12;</li> <li>VR-DOT = NR</li> <li>• CCS = 3</li> <li>• CAMCI = 30</li> <li>• CADi = 10;</li> <li>CADi-2 = 10-40</li> <li>• DRA = NR</li> <li>• p-AD8 = NR</li> <li>• IQCODE = 10</li> </ul> | <p><b>For detecting dementia:</b></p> <ul style="list-style-type: none"> <li>• ACE-III at a cut-off point of &lt;81, Sn = 100</li> </ul> <p><b>For detecting MCI:</b></p> <ul style="list-style-type: none"> <li>• MoCA, Sn = 91-97</li> </ul> | <p><b>For detecting dementia:</b></p> <ul style="list-style-type: none"> <li>• ACE-III at a cut-off point of &lt;81, Sp=96</li> </ul> <p><b>For detecting MCI:</b></p> <ul style="list-style-type: none"> <li>• MoCA, Sp = 60-80</li> </ul> | <p>For detecting dementia: Screening tools less sensitive to ACE-III but with relatively high Sn/Sp values were: SLUMS, RCS, and BCAT.</p> <p>For detecting MCI: The MoCA was the most commonly used tool and had the highest Sn/Sp ranges. Less specific to the MoCA but among the most sensitive tools were the (VR-DOT) and IQCODE. Tools with the highest specificity but with lower sensitivity were: The 5 Objects Test, RCS, CPS, and (VT-VSM).</p> | <p>NR-Not Reported, MCI-Mild Cognitive Impairment, (MoCA-B)Montreal Cognitive Assessment-Basic, (MoCA)-Montreal Cognitive Assessment, SPMSQ-Short Portable Mental Status Questionnaire, (MEFO)Memory, fluency and orientation, (ACE-III)-Addenbrooke's Cognitive Examination III, (AQT-CF)-A Quick Test of Cognitive Speed, (SLUMS)- Saint Louis University Mental Status, (BNB)-Brief Neuropsychological Battery Semantic Fluency, (SMCC)-The Subjective Memory Complaint Clinical, (CASI-S)-Cognitive Abilities Screening Instrument-Short, (RCS)-Rapid Cognitive Screen, (CPS)-Cognitive Performance Scale, (BIMS)-Brief Interview for Mental Status, (BCAT)-Brief Cognitive Assessment Tool, (3MS)-Modified Mini-Mental State Examination, (MIS)-Memory Impairment Screen, (MF-2)-Memory Function 2, (VT-VSM)-Virtual Reality technology: Virtual supermarket, (VR-DOT)-Virtual Reality Day-Out-Task, (CCS)Computerized Cognitive Screening Tests, (CAMCI)-Computerized</p> |
|------------------------------------|----|---------------------------------------------------------------------------------------------------------------------------------------------------------------------------------------------------------------------------------------------------------------------------------------------------------------------------------------------------------------------------------------------------------------------------------------------------------------------------------------------------------------------------------------------------------------------------------|-----------------------------------------------------------------------------|----------------------------------------|-----------------------------------------------------------------------------------------------------------------------------------------------------------------------------------------------------------------------------------------------------------------------------------------------------------------------------------------------------------------------------------------------------------------------------------------------------------------------------------------------------------------------------------------------------------------------------------------------------------------------------------------------------------------------------------------------------------------------------------------------------------------------------------------------|------------------------------------------------------------------------------------------------------------------------------------------------------------------------------------------------------------------------------------------------|---------------------------------------------------------------------------------------------------------------------------------------------------------------------------------------------------------------------------------------------|------------------------------------------------------------------------------------------------------------------------------------------------------------------------------------------------------------------------------------------------------------------------------------------------------------------------------------------------------------------------------------------------------------------------------------------------------------|---------------------------------------------------------------------------------------------------------------------------------------------------------------------------------------------------------------------------------------------------------------------------------------------------------------------------------------------------------------------------------------------------------------------------------------------------------------------------------------------------------------------------------------------------------------------------------------------------------------------------------------------------------------------------------------------------------------------------------------------------------------------------------------------------------------------------------------------------------------------------------------------------------------------------------------------------------------------------------|

Assessment of Mild  
Cognitive Impairment,  
(CAI)-[Cognitive

|                                         |    |                                                                                                                                                                                                                                                                   |                |          |                |                |                |                                                                                                                                                                                                            |                                                                                                                                                                                                                                                        |
|-----------------------------------------|----|-------------------------------------------------------------------------------------------------------------------------------------------------------------------------------------------------------------------------------------------------------------------|----------------|----------|----------------|----------------|----------------|------------------------------------------------------------------------------------------------------------------------------------------------------------------------------------------------------------|--------------------------------------------------------------------------------------------------------------------------------------------------------------------------------------------------------------------------------------------------------|
|                                         |    |                                                                                                                                                                                                                                                                   |                |          |                |                |                |                                                                                                                                                                                                            | Assessment for Dementia, iPad version], (CADI-2)[Revised Cognitive Assessment for Dementia, iPad version], (DRA)Dementia Risk Assessment, (p-AD8)-Participant-rated, (IQCODE)- Informant Questionnaire on Cognitive Decline in the Elderly individuals |
| Smith <i>et al.</i> ,<br>United Kingdom | 33 | <ul style="list-style-type: none"> <li>• Rural Older Adult Memory Evaluation</li> <li>• Mini-Cog</li> <li>• PRISM-PC</li> <li>• SAPH questionnaire</li> <li>• MMSE and clinical history/examination</li> <li>• 7-minute screen</li> <li>• CIE and MMSE</li> </ul> | Not mentioned. | Dementia | Not mentioned. | Not mentioned. | Not mentioned. | There is insufficient evidence to support the adoption of these programmes into practice. Six positive and eight negative effects of primary care screening and early diagnosis of dementia were reported. | (PRISM-PC)-Perceptions Regarding Investigational Screening for Memory in Primary Care, SAPHDementia Screening and Perceived Hames, CIEThe Canberra Interview for the Elderly                                                                           |

|                                         |           |                                                                                                                                                                                                                                                                                                                                                         |             |                 |                                                                                                                                                                                                                                                                                                                 |                                                                                                                                                                                                                                                                                                                                                                                                                                                                                                                              |                                                                                                                                                                                                                                                                                                                                                                                                                                                                                                                            |                                                                                                                                                                                                                                                                                                                                                                                                                                                                                                                                                                                                                                                                                                          |                                                                                                                                                                                                                                                                                             |
|-----------------------------------------|-----------|---------------------------------------------------------------------------------------------------------------------------------------------------------------------------------------------------------------------------------------------------------------------------------------------------------------------------------------------------------|-------------|-----------------|-----------------------------------------------------------------------------------------------------------------------------------------------------------------------------------------------------------------------------------------------------------------------------------------------------------------|------------------------------------------------------------------------------------------------------------------------------------------------------------------------------------------------------------------------------------------------------------------------------------------------------------------------------------------------------------------------------------------------------------------------------------------------------------------------------------------------------------------------------|----------------------------------------------------------------------------------------------------------------------------------------------------------------------------------------------------------------------------------------------------------------------------------------------------------------------------------------------------------------------------------------------------------------------------------------------------------------------------------------------------------------------------|----------------------------------------------------------------------------------------------------------------------------------------------------------------------------------------------------------------------------------------------------------------------------------------------------------------------------------------------------------------------------------------------------------------------------------------------------------------------------------------------------------------------------------------------------------------------------------------------------------------------------------------------------------------------------------------------------------|---------------------------------------------------------------------------------------------------------------------------------------------------------------------------------------------------------------------------------------------------------------------------------------------|
| <p>Brodsky <i>et al.</i>, Australia</p> | <p>83</p> | <p><b>Instruments Validated in General Practice, Community or Population Samples:</b></p> <ul style="list-style-type: none"> <li>• AMT</li> <li>• Cambridge Cognitive Examination</li> <li>• CDT</li> <li>• GPCOG</li> <li>• Mini-Cog</li> <li>• MIS</li> <li>• MMSE</li> <li>• Short and Sweet Screening Instrument</li> <li>• Short IQCODE</li> </ul> | <p>MMSE</p> | <p>Dementia</p> | <ul style="list-style-type: none"> <li>• AMT = 3:16</li> <li>• Cambridge Cognitive Examination = 20</li> <li>• CDT = 2:16</li> <li>• GPCOG = 4.5</li> <li>• Mini-Cog = 2-4</li> <li>• MIS = 4</li> <li>• MMSE = 4</li> <li>• Short and Sweet Screening Instrument = 10</li> <li>• Short IQCODE = 30s</li> </ul> | <p><b>Screening tests validated in general practice, community or population samples:</b></p> <ul style="list-style-type: none"> <li>• AMT-100 (95% CI 70-100)</li> <li>• Cambridge Cognitive Examination-88 (95% CI 64-99)</li> <li>• CDT-76 (95% CI 60-88)</li> <li>• GPCOG-85 (95% CI 76-92)</li> <li>• Mini-Cog76 (95% CI 65-85)</li> <li>• MIS-80 (95% CI 66-90)</li> <li>• MMSE-69 (95% CI 66-73)</li> <li>• Short and Sweet Screening Instrument94 (95% CI 88-96)</li> <li>• Short IQCODE-79 (95% CI 6590)</li> </ul> | <p><b>Screening tests validated in general practice, community or population samples:</b></p> <ul style="list-style-type: none"> <li>• AMT-82 (95% CI 72-90)</li> <li>• Cambridge Cognitive Examination-75 (95% CI 67-83)</li> <li>• CDT-81 (95% CI 77-84)</li> <li>• GPCOG-86 (95% CI 81-91)</li> <li>• Mini-Cog89 (95% CI 87-91)</li> <li>• MIS-96 (95% CI 94-98)</li> <li>• MMSE-89 (95% CI 87-92)</li> <li>• Short and Sweet Screening Instrument-91 (95% CI 9092)</li> <li>• Short IQCODE-82 (95% CI 7985)</li> </ul> | <p><b>Screening tests validated in general practice, community or population samples:</b></p> <p>AMT had a PPV=0.42 (95% CI), NPV=1.00 (95% CI), misclassification of 16%, had internal consistency and face validity.</p> <p>Mini-Cog had a PPV=0.34 (95% CI), NPV=0.98 (95% CI), 12% misclassification, no education bias or language/cultural bias, and had face validity*.</p> <p>The AMT, CDT, GPCOG, Short IQCODE, Mini-Cog, and MIS all had a NPV =&lt; MMSE (0.92). The GPCOG, Mini-Cog and MIS had a misclassification rate □=&lt; MMSE (15%) and had a high sensitivity and specificity (&gt;=80%) and were therefore chosen as the most suitable instruments for use in general practice.</p> | <p>MAT-Mental Alternation Test. *- (Based on Diagnostic and Statistical Manual of Mental Disorders, Fourth Edition criteria requiring that instruments test memory and at least one other cognitive domain). CDTClock Drawing Test. GPCOG-General Practitioner Assessment of Cognition.</p> |
|-----------------------------------------|-----------|---------------------------------------------------------------------------------------------------------------------------------------------------------------------------------------------------------------------------------------------------------------------------------------------------------------------------------------------------------|-------------|-----------------|-----------------------------------------------------------------------------------------------------------------------------------------------------------------------------------------------------------------------------------------------------------------------------------------------------------------|------------------------------------------------------------------------------------------------------------------------------------------------------------------------------------------------------------------------------------------------------------------------------------------------------------------------------------------------------------------------------------------------------------------------------------------------------------------------------------------------------------------------------|----------------------------------------------------------------------------------------------------------------------------------------------------------------------------------------------------------------------------------------------------------------------------------------------------------------------------------------------------------------------------------------------------------------------------------------------------------------------------------------------------------------------------|----------------------------------------------------------------------------------------------------------------------------------------------------------------------------------------------------------------------------------------------------------------------------------------------------------------------------------------------------------------------------------------------------------------------------------------------------------------------------------------------------------------------------------------------------------------------------------------------------------------------------------------------------------------------------------------------------------|---------------------------------------------------------------------------------------------------------------------------------------------------------------------------------------------------------------------------------------------------------------------------------------------|

|                                          |    |                                                                                                                                                                                                                                                                                   |                                                                                                                                             |                                                    |                                                                                                                                                                                                                                                                                                                                                                    |                                                                                                                                                                                                                                                                                                                          |                                                                                                                                                                                                                                                                                                                |                                                                                                                                                                                                                                                                                                                                                                                                                     |                                                                                                                                                                                                           |
|------------------------------------------|----|-----------------------------------------------------------------------------------------------------------------------------------------------------------------------------------------------------------------------------------------------------------------------------------|---------------------------------------------------------------------------------------------------------------------------------------------|----------------------------------------------------|--------------------------------------------------------------------------------------------------------------------------------------------------------------------------------------------------------------------------------------------------------------------------------------------------------------------------------------------------------------------|--------------------------------------------------------------------------------------------------------------------------------------------------------------------------------------------------------------------------------------------------------------------------------------------------------------------------|----------------------------------------------------------------------------------------------------------------------------------------------------------------------------------------------------------------------------------------------------------------------------------------------------------------|---------------------------------------------------------------------------------------------------------------------------------------------------------------------------------------------------------------------------------------------------------------------------------------------------------------------------------------------------------------------------------------------------------------------|-----------------------------------------------------------------------------------------------------------------------------------------------------------------------------------------------------------|
| Seitz <i>et al.</i> ,<br>Canada          | 4  | The Mini-Cog performed in insolation or scored based on results on the CDT or threeword recall                                                                                                                                                                                    | Standard diagnostic criteria for the clinical diagnosis of dementia                                                                         | Alzheimer's disease dementia and related dementias | Mini-Cog = 3-5 in routine practice                                                                                                                                                                                                                                                                                                                                 | <b>CarneroPardo 2013 dementia prevalence was 34.5%:</b> • 100 (95% CI 93-100)<br><b>Fuchs 2012 5.0% dementia prevalence:</b> • 100 (95% CI 84-100)<br><b>Holsinger 2012 (highest quality study) 5.5% dementia prevalence:</b> • 76 (95% CI 53-92)<br><b>McCarten 2012 90.3% dementia prevalence:</b> • 84 (95% CI 81-87) | <b>Carnero-Pardo 2013:</b> • 40 (95% CI 30-50)<br><b>Fuchs 2012:</b> • 85 (95% CI 81-89)<br><b>Holsinger 2012:</b> • 73 (95% CI 68-77)<br><b>McCarten 2012:</b> • 27 (95% CI 16-41)                                                                                                                            | Presently there is insufficient evidence to support the use of Mini-Cog in primary care. Studies mentioned are primary journal articles (crosssectional studies).                                                                                                                                                                                                                                                   |                                                                                                                                                                                                           |
| Cullen <i>et al.</i> ,<br>United Kingdom | 36 | <ul style="list-style-type: none"> <li>• 3MS</li> <li>• CASI</li> <li>• MMSE</li> <li>• SASSI</li> <li>• STMS</li> <li>• CAST</li> <li>• GPCOG</li> <li>• 7MS</li> <li>• AMT</li> <li>• Mini-Cog</li> <li>• SIS</li> <li>• T&amp;C</li> <li>• ACE-R</li> <li>• DemTect</li> </ul> | Gold standard diagnostic criteria (based on international diagnostic guidelines or clinical judgement following a full assessment battery). | Cognitive impairment or any type of dementia       | <ul style="list-style-type: none"> <li>• 3MS = 10-15</li> <li>• CASI = 15-20</li> <li>• MMSE = 8-13</li> <li>• SASSI = 10-15</li> <li>• STMS = 5</li> <li>• CAST = 15</li> <li>• GPCOG = 5</li> <li>• 7MS = 7-15</li> <li>• AMT = 5</li> <li>• Mini-Cog = 3-4</li> <li>• SIS = 5</li> <li>• T&amp;C = 1</li> <li>• ACE-R = 16</li> <li>• DemTect = 8-10</li> </ul> | <ul style="list-style-type: none"> <li>• 3MS = 83-94</li> <li>• CASI = 91-95</li> <li>• MMSE = 69-91</li> <li>• SASSI = 94</li> <li>• STMS = 86-95</li> <li>• CAST = 88-95</li> <li>• GPCOG = 85</li> <li>• 7MS = 91</li> <li>• AMT = 73-100</li> <li>• Mini-Cog = 76-99</li> <li>• SIS = 81-</li> </ul>                 | <ul style="list-style-type: none"> <li>• 3MS = 85-90</li> <li>• CASI = 37-97</li> <li>• MMSE = 87-99</li> <li>• SASSI = 81-91</li> <li>• STMS = 88-94</li> <li>• CAST = 88-100</li> <li>• GPCOG = 86</li> <li>• 7MS = 94</li> <li>• AMT = 71-100</li> <li>• Mini-Cog = 89-93</li> <li>• SIS = 88-91</li> </ul> | These tests were selected as brief assessment tools in the doctor's office due to their reported sensitivity and specificity values that were >85% for all dementia types together or for more than one particular subtype alone, and/or they covered at least three key domains.<br><br>The 3MS and CASI are the only tests which cover all six key abilities (Attention/working memory, verbal recall, expressive | (ACE-R)-Addenbrooke's Cognitive Examination Revised, STMS-Short Test of Mental Status, CCSE-Cognitive Capacity Screening Examination, (R-CAMCOG)-Rotterdam Version of the Cambridge Cognitive Examination |

|                                |    |                                                                                                                                                                                                                                                                         |                                                        |                                                                       |                                                                                                                                                                                                                                                                                                                                                       |                                                                                                                                                                                                                                                                                                                                                                                                               |                                                                                                                                                                                                                                                                                                                                                                                                                                                                    |                                                                                                                                                                                                                                                                                                                                                                                                                                                                                                                                                                                                                                            |                                                                                                                                                                                                                                                                                                                                                                          |
|--------------------------------|----|-------------------------------------------------------------------------------------------------------------------------------------------------------------------------------------------------------------------------------------------------------------------------|--------------------------------------------------------|-----------------------------------------------------------------------|-------------------------------------------------------------------------------------------------------------------------------------------------------------------------------------------------------------------------------------------------------------------------------------------------------------------------------------------------------|---------------------------------------------------------------------------------------------------------------------------------------------------------------------------------------------------------------------------------------------------------------------------------------------------------------------------------------------------------------------------------------------------------------|--------------------------------------------------------------------------------------------------------------------------------------------------------------------------------------------------------------------------------------------------------------------------------------------------------------------------------------------------------------------------------------------------------------------------------------------------------------------|--------------------------------------------------------------------------------------------------------------------------------------------------------------------------------------------------------------------------------------------------------------------------------------------------------------------------------------------------------------------------------------------------------------------------------------------------------------------------------------------------------------------------------------------------------------------------------------------------------------------------------------------|--------------------------------------------------------------------------------------------------------------------------------------------------------------------------------------------------------------------------------------------------------------------------------------------------------------------------------------------------------------------------|
|                                |    |                                                                                                                                                                                                                                                                         |                                                        |                                                                       |                                                                                                                                                                                                                                                                                                                                                       | 89<br>• T&C = 63-95<br>• ACE-R = 84-94<br>• DemTect = 100 (Alzheimer's dementia)                                                                                                                                                                                                                                                                                                                              | • T&C = 54-96<br>• ACE-R = 89-100<br>• DemTect = 92 (Alzheimer's dementia)                                                                                                                                                                                                                                                                                                                                                                                         | language, verbal fluency, visual construction, reasoning/judgement).                                                                                                                                                                                                                                                                                                                                                                                                                                                                                                                                                                       |                                                                                                                                                                                                                                                                                                                                                                          |
| Lischka <i>et al.</i> , Canada | 12 | <ul style="list-style-type: none"> <li>• MIS</li> <li>• IST, BVRT</li> <li>• CAMCI</li> <li>• ACE</li> <li>• ADAS-Cog</li> <li>• CAMCOG</li> <li>• MoCA</li> <li>• S-MMSE</li> <li>• IQCODE</li> <li>• STMS</li> <li>• MMSE</li> <li>• HDS-R</li> <li>• CCSE</li> </ul> | A full clinical examination as the reference standard. | Dementia, MCI, amnesic MCI, mild dementia, and questionable dementia. | <ul style="list-style-type: none"> <li>• MIS, IST = 4</li> <li>• IST, BVRT = 1</li> <li>• CAMCI = 15</li> <li>• ACE = 15</li> <li>• ADAS-Cog = NR</li> <li>• CAMCOG = 20</li> <li>• MoCA = 10-12</li> <li>• S-MMSE = 10</li> <li>• IQCODE = 10-20</li> <li>• STMS = 5</li> <li>• MMSE = 5-10</li> <li>• HDS-R = NR</li> <li>• CCSE = 10-12</li> </ul> | <ul style="list-style-type: none"> <li>• MIS = 84, IST = 81</li> <li>• IST, BVRT - Cutoff level 1 = 90.8</li> <li>• CAMCI = 83.4</li> <li>• ACE - Cutoff &lt;88/100 = 100</li> <li>• ADAS-Cog - Cutoff &lt;75/100 = 85</li> <li>• CAMCOG = 76 for memory section</li> <li>• MoCA = 94</li> <li>• S-MMSE = 14</li> <li>• IQCODE = 41</li> <li>• STMS = ≤ 80</li> <li>• MMSE = 31</li> <li>• HDS-R =</li> </ul> | <ul style="list-style-type: none"> <li>• MIS = 84, IST = 81</li> <li>• IST, BVRT - Cutoff level 1 = 52.2</li> <li>• CAMCI = 78.5</li> <li>• ACE - Cutoff &lt;88/100 = 43</li> <li>• ADAS-Cog - Cutoff &lt;75/100 = 83</li> <li>• CAMCOG = 96 for memory section</li> <li>• MoCA = 50</li> <li>• S-MMSE = 100</li> <li>• IQCODE = 67</li> <li>• STMS = ≤ 80</li> <li>• MMSE = 96</li> <li>• HDS-R = 74 for the dementia diabetic group</li> <li>• CCSE -</li> </ul> | <b>Tools with the highest specificity rates:</b> <ul style="list-style-type: none"> <li>• MMSE</li> <li>• S-MMSE</li> </ul> <b>Tests with the highest sensitivities:</b> <ul style="list-style-type: none"> <li>• HDS-R</li> <li>• ACE, which decreased depending on cut-off value</li> <li>• MoCA for the dementia group and 83% for the MCI group</li> <li>• CAMCI</li> <li>• CCSE</li> <li>• The combination of the MMSE, IST, and BVRT at 90.8% for the first cut-off level.</li> </ul> <p>The ACE demonstrated good diagnostic accuracy with AUC=0.98. Xu et al. (2002) found that the CCSE was the best predictive screen in MCI</p> | (IST,BVRT)-Isaacs Set Test, Benton's Visual Retention Test, CAMCIChinese Abbreviated Mild Cognitive Impairment Test, (ADAS-Cog)-Alzheimer Disease Assessment ScaleCognitive Subscale, (SMMSE)-Standardized Mini-Mental State Examination, (HDS-R)-Hasegawa Dementia Scale-Revised, CCSE-Cognitive Capacity Screening Examination, CAMCOG-Cambridge Cognitive Examination |

|                                        |    |                                                                                                                         |        |          |                |                                                                                                                                                     |                                                                                                                                                        |                                                                                                                                                                                                       |                                                                                                                                                                                                                                                       |
|----------------------------------------|----|-------------------------------------------------------------------------------------------------------------------------|--------|----------|----------------|-----------------------------------------------------------------------------------------------------------------------------------------------------|--------------------------------------------------------------------------------------------------------------------------------------------------------|-------------------------------------------------------------------------------------------------------------------------------------------------------------------------------------------------------|-------------------------------------------------------------------------------------------------------------------------------------------------------------------------------------------------------------------------------------------------------|
|                                        |    |                                                                                                                         |        |          |                | 92 for the dementia diabetic group • CCSE - Cutoff 26/25 = 88.1                                                                                     | Cutoff 26/25 = 83.5                                                                                                                                    | participants for diagnosing all dementia due to its high sensitivity (88.1%) and specificity (83.5%).                                                                                                 |                                                                                                                                                                                                                                                       |
| Boustani <i>et al.</i> , United States | 61 | <ul style="list-style-type: none"> <li>• MMSE</li> <li>• FAQ</li> <li>• BIMC</li> <li>• BOMC</li> <li>• STMS</li> </ul> | DSM-IV | Dementia | Not mentioned. | <ul style="list-style-type: none"> <li>• MMSE = 71-92</li> <li>• FAQ = 90</li> <li>• BIMC = 90</li> <li>• BOMC = 69</li> <li>• STMS = 81</li> </ul> | <ul style="list-style-type: none"> <li>• MMSE = 56-96</li> <li>• FAQ = 90</li> <li>• BIMC = 65-90</li> <li>• BOMC = 90</li> <li>• STMS = 90</li> </ul> | The MMSE has limited Sp when the cut-point is set for higher Sn. Accuracy of the MMSE changes based upon the patients age, education level and ethnicity and therefore requires adjustment when used. | BIMC-Blessed Information Memory Concentration; BOMC-Blessed Orientation Memory Concentration; FAQ-Functional Activities Questionnaire; STMS-Short Test of Mental Status; DSM-IV Diagnostic and Statistical Manual of Mental Disorders, fourth edition |
|                                        |    |                                                                                                                         |        |          |                |                                                                                                                                                     |                                                                                                                                                        |                                                                                                                                                                                                       |                                                                                                                                                                                                                                                       |
